# Supplementary material
Source: Springer Nature journal article supplement (https://www.springermedizin.de/resource/supplementary/13063_2012_1109_MOESM2_ESM.pdf/9619498)
Supplement: MOESM2 [file 9619498]

Eligible patients with mild biliary pancreatitis

All discharge criteria are met:

- 1) The treating physician anticipates that the patient can be discharged within 1 - 2 days;
- 2) No need of opioid analgesics;
- 3) Declining CRP levels and  $< 100$  U/L mg/dL;
- 4) No evidence of local or systemic complications (e.g. no fever);
- 5) The patient has resumed oral intake.

Informed consent

**Randomization**

Early laparoscopic cholecystectomy  
< 72 hours after randomization

Interval laparoscopic cholecystectomy  
25 – 30 days after randomization
